# Supplementary material
Source: Royal Society of Chemistry journal article supplement (doi:10.1039/d6gc00439c)
Supplement: d6gc00439c1.pdf [file d6gc00439c1.pdf]

## Supporting information for

### Self-Powered Aluminium Batteries for Sustainable Water Treatment: Performance, Mechanisms, and Techno-Economic Assessment

Yiqi Tang <sup>a,b</sup>, Zupei Wang <sup>a,b</sup>, Weiwei Du <sup>a,b</sup>, Xiangjie Ma <sup>a,b</sup>, Haochuan Lin <sup>a,b,c</sup>,  
Huanhuan Tang <sup>a,b</sup>, Hong Yao <sup>a,b</sup>, Xinyang Li <sup>a,b\*</sup>

<sup>a</sup> Beijing Key Laboratory of Emerging Contaminants Control Technologies and Intelligent Equipment in Water, School of Environment, Beijing Jiaotong University, Beijing, 100044, PR China

<sup>b</sup> Engineering Research Center of Clean and Low-carbon Technology for Intelligent Transportation, Ministry of Education, Beijing, 100816, PR China

<sup>c</sup> Institute of Environment and Ecology, Tsinghua Shenzhen International Graduate School, Tsinghua University, Shenzhen, Guangdong, 518055, PR China

\*Corresponding author: Xinyang Li ([lixinyang@bjtu.edu.cn](mailto:lixinyang@bjtu.edu.cn)); Tel: +86 010-5168-5917

## Table of Contents

|                                                                            |    |
|----------------------------------------------------------------------------|----|
| S1. Parameters, calculation, and sensitivity analysis of TEA .....         | 3  |
| <i>S1.1 Capital expenditure and operational expenditure analysis</i> ..... | 3  |
| <i>S1.2 The calculation of levelized cost of treatment (LCOT)</i> .....    | 6  |
| <i>S1.3 Sensitivity analysis</i> .....                                     | 7  |
| S2. Radar chart of three systems .....                                     | 11 |
| Reference.....                                                             | 13 |

**Table S1.** Parameter selection for scene settings in TEA.

**Table S2.** Parameter selection for waste aluminium self-powered system in TEA.

**Table S3.** Parameter selection for commercial aluminium self-powered system in TEA.

**Table S4.** Parameter selection for conventional electrocoagulation system in TEA.

**Table S5.** Summary of computation and result used for TEA.

**Table S6.** Baseline of LCOT in different systems in TEA.

**Table S7.** Summary of results used for sensitivity analysis in TEA.

**Table S8.** Summary of water treatment parameters for different aluminium-based systems.

**Figure S1.** Sensitivity analysis in the context of waste, commercial aluminium, and conventional electrocoagulation.

## S1. Parameters, calculation, and sensitivity analysis of TEA

### S1.1 Capital expenditure and operational expenditure analysis

**Table S1.** Parameter selection for scene settings in TEA.

| Parameter                                       | Value | Unit                             | Ref |
|-------------------------------------------------|-------|----------------------------------|-----|
| Daily processing capacity*                      | 0.4   | $\text{m}^3 \cdot \text{d}^{-1}$ | [1] |
| Unit price of waste aluminium                   | 1.49  | $\$ \cdot \text{kg}^{-1}$        | [2] |
| Unit price of waste aluminium processing        | 0.2   | $\$ \cdot \text{kg}^{-1}$        | [3] |
| Al content in waste aluminium                   | 95.17 | %                                | [2] |
| Unit price of commercial aluminium              | 79.7  | $\$ \cdot \text{kg}^{-1}$        | [2] |
| Unit price of commercial aluminium processing   | 2.5   | $\$ \cdot \text{kg}^{-1}$        | [3] |
| Al content in commercial aluminium              | 74.07 | %                                | [2] |
| Lifespan of battery                             | 1     | year                             | -   |
| Unit price of aluminium phosphate               | 1.3   | $\$ \cdot \text{kg}^{-1}$        | [4] |
| Unit output of aluminium phosphate**            | 0.354 | $\text{kg} \cdot \text{m}^{-3}$  | [2] |
| Maintenance and labour industry coefficients*** | 5     | %                                | [5] |
| Electrolyte (NaCl) consumption                  | 0.5   | $\text{kg} \cdot \text{m}^{-3}$  | [6] |
| Unit price of electrolyte (NaCl)                | 0.025 | $\$ \cdot \text{kg}^{-1}$        | [7] |
| Reactor area                                    | 10    | $\text{m}^2$                     | -   |
| Power density of waste aluminium                | 23.02 | $\text{mW} \cdot \text{g}^{-1}$  | [2] |
| Power density of commercial aluminium           | 0.613 | $\text{mW} \cdot \text{g}^{-1}$  | [2] |
| Unit price of electricity                       | 0.1   | $\$ \cdot \text{kWh}^{-1}$       | [8] |

**Table S2.** Parameter selection for waste aluminium self-powered system in TEA.

| Parameter                                 | Value | Unit                                    | Ref  |
|-------------------------------------------|-------|-----------------------------------------|------|
| Waste aluminium consumption               | 0.03  | $\text{kg} \cdot \text{m}^{-3}$         | [9]  |
| Cost proportion of motor components       | 10    | %                                       | [10] |
| Cost proportion of installation           | 30    | %                                       | [11] |
| Indirect cost proportion                  | 5     | %                                       | [12] |
| Reactor equipment factor                  | 800   | $\$ \cdot \text{d} \cdot \text{m}^{-3}$ | -    |
| Quality of waste aluminium in the reactor | 30.76 | g                                       | [2]  |

**Table S3.** Parameter selection for commercial aluminium self-powered system in TEA.

| Parameter                                      | Value    | Unit                                    | Ref  |
|------------------------------------------------|----------|-----------------------------------------|------|
| Commercial aluminium consumption               | 0.03     | $\text{kg} \cdot \text{m}^{-3}$         | [9]  |
| Cost proportion of motor components            | 15       | %                                       | [10] |
| Cost proportion of installation                | 35       | %                                       | [11] |
| Indirect cost proportion                       | 8        | %                                       | [12] |
| Reactor equipment factor                       | 1000     | $\$ \cdot \text{d} \cdot \text{m}^{-3}$ | -    |
| Quality of commercial aluminium in the reactor | 76530.61 | g                                       | [2]  |

**Table S4.** Parameter selection for conventional electrocoagulation system in TEA.

| Parameter                            | Value  | Unit                 | Ref  |
|--------------------------------------|--------|----------------------|------|
| Waste aluminium consumption          | 0.0943 | kg·m <sup>-3</sup>   | [13] |
| Cost proportion of motor components* | 20     | %                    | [10] |
| Cost proportion of installation**    | 40     | %                    | [11] |
| Indirect cost proportion***          | 10     | %                    | [12] |
| Specific energy consumption          | 1      | kWh·m <sup>-3</sup>  | [14] |
| Reactor equipment factor             | 1200   | \$·d·m <sup>-3</sup> | -    |

**Table S5.** Summary of computation and result used for TEA.

| Method                                   | Description                           | Computation and result                                                                                                               |
|------------------------------------------|---------------------------------------|--------------------------------------------------------------------------------------------------------------------------------------|
| Waste aluminium self-powered system      | Reactor equipment costs               | $= 800 (\$ \cdot d \cdot m^{-3}) \times 0.4 (m^3 \cdot d^{-1}) = 320 \$$                                                             |
|                                          | Other capital expenditure costs       | $= 320 (\$) \times 10\% + 320 (\$) \times 30\% + 320 (\$) \times 5\% = 144 \$$                                                       |
|                                          | Aluminium consumption costs           | $= 0.03 (kg \cdot m^{-3}) \times 365 (d) \times 0.4 (m^3 \cdot d^{-1}) \times (1.49+0.2) (\$ \cdot kg^{-1}) / 95.17\% = 7.778 \$$    |
|                                          | Electrolyte (NaCl) costs              | $= 0.5 (kg \cdot m^{-3}) \times 365 (d) \times 0.4 (m^3 \cdot d^{-1}) \times 0.025 (\$ \cdot kg^{-1}) = 1.825 \$$                    |
|                                          | Maintenance, repairs and labour costs | $= (320 + 144) (\$) \times 5\% = 23.200 \$$                                                                                          |
|                                          | Aluminium phosphate revenue           | $= 0.354 (kg \cdot m^{-3}) \times 365 (d) \times 0.4 (m^3 \cdot d^{-1}) \times 1.3 (\$ \cdot kg^{-1}) \times (1+28\%) = 86.002 \$$   |
|                                          | Electricity revenue                   | $= 30.76 (g) \times 23.02 (mW \cdot g^{-1}) \times 8760 (h \cdot y^{-1}) / 10^6 \times 0.1 (\$ \cdot kWh^{-1}) = 0.620 \$$           |
| Commercial aluminium self-powered system | Reactor equipment costs               | $= 1000 (\$ \cdot d \cdot m^{-3}) \times 0.4 (m^3 \cdot d^{-1}) = 400 \$$                                                            |
|                                          | Other capital expenditure costs       | $= 400 (\$) \times 15\% + 400 (\$) \times 35\% + 400 (\$) \times 8\% = 232 \$$                                                       |
|                                          | Aluminium consumption costs           | $= 0.03 (kg \cdot m^{-3}) \times 365 (d) \times 0.4 (m^3 \cdot d^{-1}) \times (79.7+2.5) (\$ \cdot kg^{-1}) / 74.07\% = 486.075 \$$  |
|                                          | Electrolyte (NaCl) costs              | $= 0.5 (kg \cdot m^{-3}) \times 365 (d) \times 0.4 (m^3 \cdot d^{-1}) \times 0.025 (\$ \cdot kg^{-1}) = 1.825 \$$                    |
|                                          | Maintenance, repairs and labour costs | $= (400 + 232) (\$) \times 5\% = 31.600 \$$                                                                                          |
|                                          | Aluminium phosphate revenue           | $= 0.354 (kg \cdot m^{-3}) \times 365 (d) \times 0.4 (m^3 \cdot d^{-1}) \times 1.3 (\$ \cdot kg^{-1}) = 67.189 \$$                   |
|                                          | Electricity revenue                   | $= 76530.61 (g) \times 0.613 (mW \cdot g^{-1}) \times 8760 (h \cdot y^{-1}) / 10^6 \times 0.1 (\$ \cdot kWh^{-1}) = 41.096 \$$       |
| Conventional electrocoagulation system   | Reactor equipment costs               | $= 1200 (\$ \cdot d \cdot m^{-3}) \times 0.4 (m^3 \cdot d^{-1}) = 480 \$$                                                            |
|                                          | Other capital expenditure costs       | $= 480 (\$) \times 20\% + 480 (\$) \times 40\% + 480 (\$) \times 10\% = 336 \$$                                                      |
|                                          | Aluminium consumption costs           | $= 0.0943 (kg \cdot m^{-3}) \times 365 (d) \times 0.4 (m^3 \cdot d^{-1}) \times (1.49+0.2) (\$ \cdot kg^{-1}) / 95.17\% = 24.448 \$$ |
|                                          | Electrolyte (NaCl) costs              | $= 0.5 (kg \cdot m^{-3}) \times 365 (d) \times 0.4 (m^3 \cdot d^{-1}) \times 0.025 (\$ \cdot kg^{-1}) = 1.825 \$$                    |
|                                          | Maintenance, repairs and labour costs | $= (480 + 336) (\$) \times 5\% = 40.800 \$$                                                                                          |
|                                          | Aluminium phosphate revenue           | $= 0.354 (kg \cdot m^{-3}) \times 365 (d) \times 0.4 (m^3 \cdot d^{-1}) \times 1.3 (\$ \cdot kg^{-1}) \times (1+28\%) = 86.002 \$$   |
|                                          | Electricity costs                     | $= 1.0 (kWh \cdot m^{-3}) \times 365 (d) \times 0.4 (m^3 \cdot d^{-1}) \times 0.1 (\$ \cdot kWh^{-1}) = 14.6 \$$                     |

**S1.2 The calculation of levelized cost of treatment (LCOT)**

Levelized cost of treatment (LCOT) is calculated based on the TEA benchmark parameters (annualised CAPEX + OPEX), as well as the calculation formula. The TEA model is assumed to adopt a standard linear structure and will be verified later. And the results of the calculation of LCOT are shown in **Table S6**.

$$LCOT = \frac{\sum (Annualized\ CAPEX + OPEX) - Byproduct\ revenue}{Annual\ water\ volume}$$

\\*  
ME  
RG  
EF  
OR  
MA  
T  
(S1)

$$Annualized\ CAPEX = CAPEX \times CRF$$

\\*  
ME  
RG  
EF  
OR  
MA  
T  
(S2)

Capital recovery factor (CRF) is used to amortise the initial investment (CAPEX) over the project's lifespan in an equal annualised manner.

$$CRF(i, n) = \frac{i(1+i)^n}{(1+i)^n - 1} \tag{S3}$$

where:

*i*: Annual discount rate. In this study, it is calculated as 0.1;

*n*: Economic lifespan of the project (year). In this study, it is calculated as 1 year.

Among them, each cost item (such as equipment, electrodes, and maintenance) is directly and linearly added up to the total cost, without any nonlinear interactions (such as exponential decay or threshold effects).

**Table S6.** Baseline of LCOT in different systems in TEA.

| System                                   | LCOT (\$·m <sup>-3</sup> ) |
|------------------------------------------|----------------------------|
| Waste aluminium self-powered system      | 3.127                      |
| Commercial aluminium self-powered system | 7.578                      |
| Conventional electrocoagulation system   | 6.118                      |

### ***S1.3 Sensitivity analysis***

The sensitivity analysis assumes that each cost item has a linear relationship with the total cost, and this holds true under small range perturbations ( $\pm 20\%$ ). This method is simple in calculation and has a clear physical meaning, and is widely used in TEA sensitivity analysis, especially suitable for evaluating the impact of parameter uncertainty on LCOT [15–17].

1. Sensitivity Coefficient (SC):

$$SC = \frac{\text{Annual cost of each indicator}}{CAPEX_{total} + OPEX_{total}} \quad (S4)$$

2. LCOT disturbance value:

$$LCOT \pm 20\% = LCOT_{baseline} \pm (LCOT_{baseline} \times SC \times 0.2) \quad (S5)$$

3. The variation range of LCOT:

$$\Delta LCOT_i(\%) = \pm (SC \times 20\%) \quad (S6)$$

To verify the relationship assumed above, by perturbing the electrode cost by  $\pm 20\%$  and comparing it with the baseline LCOT, the results show that  $\Delta LCOT$  maintains a strict linear relationship with the input change, proving that the linear relationship between each cost item and the total cost holds under small perturbations. This conclusion was also consistent in other electrode types and treatment scenarios [18,19].

If the model incorporates nonlinearity (such as economies of scale), it can switch to global sensitivity methods [20]. This study has a narrow parameter range, and the linear method is sufficient.

**Table S7.** Summary of results used for sensitivity analysis in TEA.

| System                                   | Expenditure | Indicator             | Annualized cost (\$·y <sup>-1</sup> ) | SC     |
|------------------------------------------|-------------|-----------------------|---------------------------------------|--------|
| Waste aluminium self-powered system      | CAPEX       | Reactor equipment     | 320.000                               | 0.780  |
|                                          |             | Electrode assembly    | 32.000                                | 0.078  |
|                                          |             | Installation          | 96.000                                | 0.234  |
|                                          |             | Indirect costs        | 16.000                                | 0.039  |
|                                          |             | Total                 | 464.000                               |        |
|                                          | OPEX        | Aluminium consumption | 7.778                                 | 0.019  |
|                                          |             | NaCl consumption      | 1.825                                 | 0.004  |
|                                          |             | Labor                 | 23.200                                | 0.057  |
|                                          |             | Byproduct revenue     | -86.622                               | -0.211 |
|                                          |             | Total                 | -53.819                               |        |
| Commercial aluminium self-powered system | CAPEX       | Reactor equipment     | 400.000                               | 0.383  |
|                                          |             | Electrode assembly    | 60.000                                | 0.058  |
|                                          |             | Installation          | 140.000                               | 0.134  |
|                                          |             | Indirect costs        | 32.000                                | 0.031  |
|                                          |             | Total                 | 632.000                               |        |
|                                          | OPEX        | Aluminium consumption | 486.075                               | 0.466  |
|                                          |             | NaCl consumption      | 1.825                                 | 0.002  |
|                                          |             | Labor                 | 31.600                                | 0.030  |
|                                          |             | Byproduct revenue     | -108.285                              | -0.104 |
|                                          |             | Total                 | 411.215                               |        |
| Conventional electro-coagulation system  | CAPEX       | Reactor equipment     | 480.000                               | 0.591  |
|                                          |             | Electrode assembly    | 96.000                                | 0.118  |
|                                          |             | Installation          | 192.000                               | 0.237  |
|                                          |             | Indirect costs        | 48.000                                | 0.059  |
|                                          |             | Total                 | 816.000                               |        |
|                                          | OPEX        | Aluminium consumption | 24.448                                | 0.030  |
|                                          |             | NaCl consumption      | 1.825                                 | 0.002  |
|                                          |             | Labor                 | 40.800                                | 0.050  |
|                                          |             | Energy consumption    | 14.600                                | 0.018  |
|                                          |             | Byproduct revenue     | -86.002                               | -0.106 |
| Total                                    | -4.329      |                       |                                       |        |

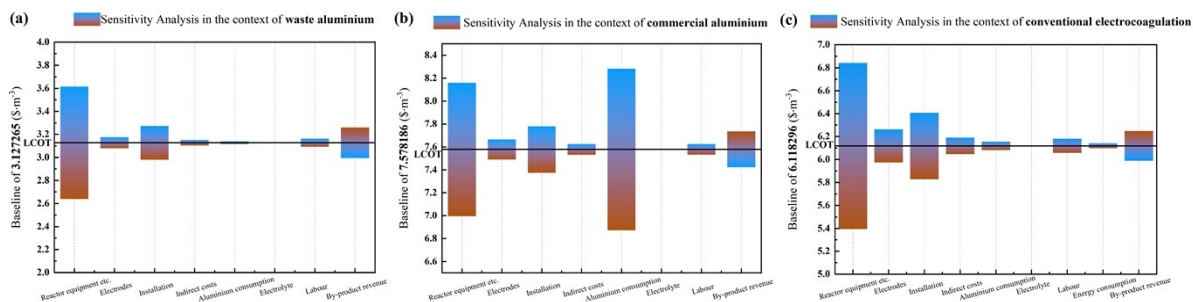

**Fig. S1.** Sensitivity analysis in the context of waste, commercial aluminium, and conventional electrocoagulation. **(a)** The sensitivity results of the system using waste aluminium as the anode material. **(b)** The sensitivity results of the system using commercial aluminium electrodes as raw materials. **(c)** The sensitivity results of the conventional electrocoagulation system.

The sensitivity analysis applies  $\pm 20\%$  perturbations to key parameters (such as reactor equipment, electrode cost, current density, operation and maintenance costs, and byproduct revenue), and evaluates their relative impact on the LCOT one by one, presenting the results in a visual form (**Fig. S1a-c** and **Table S7**). This method is widely used in TEA [21,22], and the verification of the benchmark model confirmed that the cost items have a linear relationship with the total cost. The results show that the baseline LCOTs of the three systems are  $3.127 \text{ \$}\cdot\text{m}^{-3}$ ,  $7.572 \text{ \$}\cdot\text{m}^{-3}$ , and  $6.118 \text{ \$}\cdot\text{m}^{-3}$ , respectively (**Table S6**), demonstrating a clear cost hierarchy among the three systems. Among them, the LCOT of the waste aluminium system is the most stable, indicating that it has significant advantages in both economic and operational stability, which is attributed to the dual buffering of low-cost raw materials and byproduct revenue.

In the waste aluminium self-powered system (**Fig. S1a**), the most sensitive factor for LCOT is the cost of reactor equipment ( $SC = 0.780$ ), while it is almost insensitive to operating parameters such as current density, power consumption, and electrolyte cost, revealing that its structure is mainly controlled by the one-time investment in equipment, and the operation is extremely stable, with negative buffering provided by byproduct revenues, enabling the overall economic performance to exhibit the strongest ability to resist fluctuations. In contrast, the LCOT of the commercial aluminium system (**Fig. S1b**) is most sensitive to the cost of aluminium raw materials ( $SC = 0.466$ ), while it is least sensitive to current density, energy consumption, and electrolyte cost, indicating that its economic structure is dominated by the

high price of commercial aluminium which makes it highly vulnerable to fluctuations in the material market and lacking a stable mechanism for resisting shocks. In conventional electrocoagulation systems (**Fig. S1c**), LCOT is most sensitive to the cost of reactor equipment ( $SC = 0.591$ ), while it is the least sensitive to operating parameters such as energy consumption and current density. This highly equipment-dominated cost structure implies that its economic performance is mainly limited by initial capital investment, with limited contribution from the operational side, which it difficult to reduce the overall cost by optimising the operation.

## S2. Radar chart of three systems

Based on the calculations from **Table S5**, applying these results to the TEA analysis calculations and summaries yields outcomes for different systems (**Table S8**). To clearly grasp the economic advantages and disadvantages of different systems through radar charts, we standardised the data to eliminate interference from units of measurement and numerical ranges, ensuring fairness, objectivity, and intuitiveness in the analysis, as shown in **Eqn. (S7)** [23].

$$\text{Normalization sustainability metrics} = \frac{a_{max} - a_i}{a_{max} - a_{min}} \times 100\% \quad (\text{S7})$$

Where  $a_i$  denotes the actual value of a given method for a specific metric, while  $a_{max}$  and  $a_{min}$  represent the highest and lowest observed values of that metric across all technologies being compared.

**Table S8.** Summary of water treatment parameters for different aluminium-based systems

| System                                   | Electricity revenue (%) | Electrode cost savings (%) | Capital investment Savings (%) | Byproduct revenue intensity (%) | Unit processing cost savings (%) |
|------------------------------------------|-------------------------|----------------------------|--------------------------------|---------------------------------|----------------------------------|
| Waste aluminium self-powered system      | 27.33                   | 100                        | 100                            | 97.22                           | 100                              |
| Commercial aluminium self-powered system | 100                     | 0                          | 52.27                          | 0                               | 0                                |
| Conventional electrocoagulation system   | 0                       | 96.52                      | 0                              | 100                             | 36.58                            |

The electricity revenue indicator reflects the economic expenditure of electricity consumption or the economic benefits brought by power generation. Electrode Cost Savings represents the annual cost savings resulting from electrode wear, primarily evaluated based on aluminium consumable cost data. A higher value indicates more significant savings in electrode costs. Capital Investment Savings represents cost savings on initial equipment procurement, construction, and other related expenses, primarily evaluated based on capital expenditure cost data. The byproduct revenue intensity metric represents the revenue generated from byproduct

sales per cubic meter of treated wastewater. A higher value indicates a stronger economic contribution from the byproduct, as shown in **Eqn. (S8)** [24].

$$\text{Byproduct Revenue Intensity} = \frac{(Y_p \times P_p)}{Q_{\text{annual}}} \quad (\text{S8})$$

Where:

$Y_p$  : Total annual aluminium phosphate recovered ( $\text{kg}\cdot\text{y}^{-1}$ );

$P_p$  : Market price of aluminium phosphate ( $\text{\$}\cdot\text{kg}^{-1}$ );

$Q_{\text{annual}}$  : Annual wastewater treatment volume ( $\text{m}^3\cdot\text{y}^{-1}$ ).

Unit Processing Cost Savings represents the cost savings per cubic meter of wastewater treated, derived primarily from the total treatment cost and the volume treated.

Typically, a radar chart provides an intuitive comparison of the technical and economic competitiveness across five dimensions for the waste aluminium self-powered system, conventional electrocoagulation system, and commercial aluminium self-powered system. A larger area on the radar chart indicates superior overall performance in that dimension.

## Reference

- [1] J. Hayden, B. Abbassi, Continuous Flow Electrocoagulation System for Enhanced Phosphorous Removal in Decentralized Wastewater Treatment Systems, *Water* 17 (2025) 202. <https://doi.org/10.3390/w17020202>.
- [2] X. Li, Y. Zhou, X. Ma, X. Ding, S. Lai, X. Li, G. Liu, P. Sun, H. Yao, Self-powered wastewater purification and phosphorus recovery systems with novel self-filtering Al-air batteries, *Chemical Engineering Journal* 460 (2023) 141570. <https://doi.org/10.1016/j.cej.2023.141570>.
- [3] What is Aluminum Recycling and Why Analyze Its Costs?, *Okon Recycling* (2025). <https://www.okonrecycling.com/industrial-scrap-metal-recycling/steel-and-aluminum/aluminum-recycling-costs/>.
- [4] Aluminum phosphate, 99.99% trace metals basis | Reagents, (n.d.). <https://www.reagents.com/2388362/Product/Aluminum-phosphate-99-99-trace-metals-basis>.
- [5] U.S. Environmental Protection Agency. 2023 revision to: Life cycle and cost assessments of nutrient removal technologies in wastewater treatment plants. Washington, DC: U.S. Environmental Protection Agency; 2023. EPA 832-R-21-006A (Errata). Available at: <https://www.epa.gov/system/files/documents/2023-06/life-cycle-nutrient-removal-2023-update.pdf>.
- [6] I. Heidmann, W. Calmano, Removal of Zn(II), Cu(II), Ni(II), Ag(I) and Cr(VI) present in aqueous solutions by aluminium electrocoagulation, *Journal of Hazardous Materials* 152 (2008) 934–941. <https://doi.org/10.1016/j.jhazmat.2007.07.068>.
- [7] Rock Salt Price per Ton (2025): Bulk & Industrial Costs, *MaxiSalt* (2025). <https://maxisalt.com/rock-salt-prices/>.
- [8] Y. Lu, F. Yue, T. Liu, Y.-C. Huang, F. Fu, Y. Jing, H. Yang, C. Yang, Size-effect induced controllable Cu<sup>0</sup>-Cu<sup>+</sup> sites for ampere-level nitrate electroreduction coupled with biomass upgrading, *Nat Commun* 16 (2025) 2392. <https://doi.org/10.1038/s41467-025-57097-x>.
- [9] X. Han, H. Qi, Y. Qu, Y. Feng, X. Zhao, Simultaneous Phosphate Removal and Power Generation by the Aluminum–Air Fuel Cell for Energy Self-Sufficient Electrocoagulation, *Applied Sciences* 13 (2023) 4628. <https://doi.org/10.3390/app13074628>.
- [10] R. Turton, ed., *Analysis, synthesis, and design of chemical processes*, 4th ed, Prentice Hall, Upper Saddle River, NJ, 2012.
- [11] State Water Resources Control Board. Attachment C3: Treatment cost methodology details. Sacramento, CA: State Water Resources Control Board; 2021. Available at: [https://waterboards.ca.gov/drinking\\_water/certlic/drinkingwater/docs/attachment\\_c3.pdf](https://waterboards.ca.gov/drinking_water/certlic/drinkingwater/docs/attachment_c3.pdf).
- [12] State Water Resources Control Board. Centralized Treatment Cost Estimate Methodology: Supplemental Appendix. Sacramento, CA: State Water Resources

- Control Board; 2024 June. Available at: [https://www.waterboards.ca.gov/drinking\\_water/certlic/drinkingwater/documents/needs/2024/2024costassessment-centralized-treatment.pdf](https://www.waterboards.ca.gov/drinking_water/certlic/drinkingwater/documents/needs/2024/2024costassessment-centralized-treatment.pdf).
- [13] M. Arbabi, S. Shafiei, S. Mehraban, A. Khodabakhshi, A. Abdoli, A. Arbabi, Electrocoagulation Process Using Aluminum Electrodes for Treatment of Baker's Yeast Industry Wastewater, *International Journal of Environmental Health Engineering* 11 (2022) 3. [https://doi.org/10.4103/ijehe.ijehe\\_28\\_20](https://doi.org/10.4103/ijehe.ijehe_28_20).
- [14] Australian Meat Processor Corporation. Evaluation of Electrocoagulation as a Wastewater Treatment Technology for Meat Processors. Project No. 2018-1140. Canberra (or Australia): Australian Meat Processor Corporation; 2018 Nov 30. Available at: [https://ampc.com.au/media/zkzilpee/ampc\\_evaluationofelectrocoagulationaswastewatertreatment\\_finalreport.pdf](https://ampc.com.au/media/zkzilpee/ampc_evaluationofelectrocoagulationaswastewatertreatment_finalreport.pdf).
- [15] M.D. Morris, Factorial Sampling Plans for Preliminary Computational Experiments, *Technometrics* 33 (1991) 161–174. <https://doi.org/10.1080/00401706.1991.10484804>.
- [16] F. Pianosi, T. Wagener, J. Rougier, J. Freer, J. Hall, Sensitivity Analysis of Environmental Models: A Systematic Review with Practical Workflow, (2014) 290–299. <https://doi.org/10.1061/9780784413609.030>.
- [17] A. Saltelli, M. Ratto, T. Andres, F. Campolongo, J. Cariboni, D. Gatelli, M. Saisana, S. Tarantola, Sensitivity analysis: From theory to practice, in: *Global Sensitivity Analysis. The Primer*, John Wiley & Sons, Ltd, 2007: pp. 237–275. <https://doi.org/10.1002/9780470725184.ch6>.
- [18] Y. Xu, J. Pei, L. Cui, P. Liu, T. Ma, The Levelized Cost of Storage of Electrochemical Energy Storage Technologies in China, *Frontiers in Energy Research* 10 (2022). <https://doi.org/10.3389/fenrg.2022.873800>.
- [19] L.K. Bieniasz, B. Speiser, Use of sensitivity analysis methods in the modelling of electrochemical transients Part 1. Gaining more insight into the behaviour of kinetic models, *Journal of Electroanalytical Chemistry* 441 (1998) 271–285. [https://doi.org/10.1016/S0022-0728\(97\)00443-9](https://doi.org/10.1016/S0022-0728(97)00443-9).
- [20] S. Razavi, H.V. Gupta, What do we mean by sensitivity analysis? The need for comprehensive characterization of “global” sensitivity in Earth and Environmental systems models, *Water Resources Research* 51 (2015) 3070–3092. <https://doi.org/10.1002/2014WR016527>.
- [21] A. Sinha, H. Thakkar, F. Rezaei, Y. Kawajiri, M.J. Realff, Direct Air Capture of CO<sub>2</sub> in Enclosed Environments: Design under Uncertainty and Techno-Economic Analysis, in: *Computer Aided Chemical Engineering*, Elsevier, 2018: pp. 2179–2184. <https://doi.org/10.1016/B978-0-444-64241-7.50358-X>.
- [22] G. Sin, K.V. Gernaey, M.B. Neumann, M.C.M. Van Loosdrecht, W. Gujer, Global sensitivity analysis in wastewater treatment plant model applications: Prioritizing sources of uncertainty, *Water Research* 45 (2011) 639–651. <https://doi.org/10.1016/j.watres.2010.08.025>.

- [23] S. Li, E.C.D. Tan, A. Dutta, L.J. Snowden-Swan, M.R. Thorson, K.K. Ramasamy, A.W. Bartling, R. Brasington, M.D. Kass, G.G. Zaines, T.R. Hawkins, Techno-economic Analysis of Sustainable Biofuels for Marine Transportation, *Environmental Science & Technology* (2022). <https://doi.org/10.1021/acs.est.2c03960>.
- [24] M. Molinos-Senante, F. Hernández-Sancho, R. Sala-Garrido, M. Garrido-Baserba, Economic Feasibility Study for Phosphorus Recovery Processes, *Ambio* 40 (2011) 408–416. <https://doi.org/10.1007/s13280-010-0101-9>.
